# Supplementary material
Source: PubMed Central journal article supplement (PMC5542852)
Supplement: blood765206-suppl1.pdf [file blood765206-suppl1.pdf]

## SUPPLEMENTAL METHODS

### Construction of expression vectors

Expression constructs were created by inserting cDNA sequences into the ubiquitin (*ubi*) regulated expression vector pDestTol2pA2\_Ubi:EGFP,<sup>1</sup> followed by site-directed mutagenesis<sup>2</sup> using primers specific for the desired mutations (Table S1-2). IMAGE clone 7403818 (Open Biosystems) was amplified with *f10* primers tagged with BspHI sites using Phusion DNA polymerase (New England Biolabs), and cloned into the NcoI site of pDestTol2pA2-ubi:EGFP to produce pubi:zf10-EGFP. pubi:zf10-p2A-EGFP was generated by restriction free cloning<sup>3</sup> using p2A fragments flanked by fragments of *zf10* and *egfp*. Mutagenic primers (Table S1) were used to perform site-directed mutagenesis in pubi:zf10-EGFP or zf10-p2A-EGFP. The resulting expression vectors were verified by restriction digest and sequencing (primers in Table S1).

### mRNA preparation and reverse transcription

Zebrafish embryos and larvae were homogenized in lysis buffer (Life Technologies or Qiagen) containing 1% 2-mercaptoethanol using syringes with 21 gauge needles. Total RNA was isolated with PureLink<sup>®</sup> RNA Mini Kit (Life Technologies) or RNA Mini Kit (Qiagen) according to manufacturers' instructions. Total RNA was treated with DNase I (Invitrogen) followed by first strand cDNA synthesis with oligo(dT)<sub>12-18</sub> primers (Superscript II, Invitrogen) per manufacturer's instructions. cDNA was used for RT-PCR and qPCR.

### Quantitative PCR of coagulation factor mRNAs

Three dpf offspring derived from the intercross of *f10* heterozygotes were genotyped by PCR as described in Methods. Three pools of 25 individuals per genotype were used for RNA isolation and cDNA synthesis. Quantitative PCR (qPCR) was performed on each pool in triplicate using a Bio-Rad iCycler with *18S* as an internal control. The resulting mRNA levels of target genes were normalized to *18S* followed by statistical analysis as described.<sup>4</sup>

### Measurement of larval size

Images were obtained using an Olympus stereoscope and cellSens software, calibrated with a stage micrometer slide. Anesthetized zebrafish larvae in 0.7% low melting point agarose were loaded into 1.5 - 1.8 mm outer diameter range glass capillaries (Pyrex) as described<sup>5,6</sup> and viewed at 27.4x magnification. Measurements of the rostrum to tail tip (length), eye-to-eye (width), and height at the yolk sac were obtained and averaged. Volumes were calculated by multiplying all 3 linear measurements. Images were analyzed and pixels per mm were calculated

using Photoshop CS7 (Adobe). Observers were blinded to genotype and after data collection larvae were recovered from agarose and genotyped.

### **Whole mount *in situ* hybridization (WISH)**

Staged larvae were fixed in 4% paraformaldehyde (PFA) in phosphate-buffered saline with 0.01% Tween-20 (PBST) at 4°C overnight and dehydrated stepwise into 100% methanol. Partial *f10* cDNA fragments were amplified with T7 overhangs (Table S1) to synthesize sense and antisense digoxin-labeled RNA riboprobes (DIG RNA labeling kit, Roche). The amplification of cDNA templates, synthesis of riboprobes, and WISH were performed essentially as described.<sup>7-12</sup>

### **Histologic examination**

After WISH, larvae were embedded in JB-4 plastic resin for serial sectioning. Samples were stepwise dehydrated in an ascending gradient of ethanol to a final concentration of 100%, and equilibrated in catalyzed JB-4A solution and embedding medium containing JB-4B (Electron Microscopy Sciences, Hatfield, PA) as described.<sup>10</sup> Samples were sectioned at 5 µm using a Leica RM2265 ultra-microtome (Leica Biosystems) and mounted with Permount<sup>TM</sup> (Fisher Scientific) for microscopic examination. Adult zebrafish were humanely killed and subsequently fixed with 4% PFA/PBST at 4°C overnight, embedded in paraffin, sectioned at 4-5 µm, and stained with hematoxylin and eosin.

### **Whole transcriptome sequencing**

Offspring from *f10*<sup>+/-</sup> incrosses were collected at 3 dpf, fin clipped, and placed in RNAlater (Qiagen) and stored at -80°C. Genomic DNAs from tail biopsies were isolated and genotyping performed as described above. Larvae were recovered from RNAlater, pooled, and RNA isolated using the PureLink RNA Micro kit (Invitrogen). Three biological replicates were collected for *f10*<sup>+/+</sup> and *f10*<sup>-/-</sup> genotypes, each containing pools of twenty-five larvae. At least 40 million paired end 100 base pair reads were generated from each pool using an Illumina HiSeq2000 (OtoGenetics). Reads were aligned to the zebrafish reference genome (Zv9) using STAR v2.4.0 (Dobin ref) with default parameters and processed using the DNAnexus Platform Advanced RNAseq analysis. After alignment, estimation of transcript abundance measures as fragments per kilobase of exon per million aligned fragments (FPKM) values was performed using Cufflinks in the Tuxedo protocol (Trapnell et al. 2012). Differential gene expression (counts) FPKM values were determined using Cuffdiff, a part of the Cufflinks package.

### **Intersegmental vessel measurement**

Heterozygous *flk1* zebrafish bred into a *Tg(flkl:mCherry/NTR)* background were incrossed. Intersegmental vessel (ISV) length was measured on larval offspring at 24 and 48 hours post fertilization (hpf), followed by genotyping. Three ISVs located between the edge of the yolk sac extension and tail were randomly selected for measurement. The “polyline tool” (Olympus cellSens Software) was used to trace and measure ISVs. The three measurements were averaged for each individual. Following measurement, larvae were lysed and genotyped as described (Methods).

### **Analysis of apoptosis**

Two methods were used to assess apoptosis, acridine orange staining and immunohistochemistry against caspase 3. For the former, larvae were incubated in the dark for 30 minutes at room temperature in acridine orange solution (2 µg/mL) as previously described,<sup>13</sup> followed by washing 4 times for 5 minutes each in system water. Larvae were anesthetized and visualized immediately under a fluorescence microscope (Olympus SZX16), imaged, and genotyped. The latter method was done as previously described<sup>14</sup>. Larval zebrafish were fixed in 1% PFA for 4 hours at room temperature, then washed in PBST and blocked in SBS (saponin blocking solution: 0.2% saponin, 2 mg/ml BSA, 5% lamb serum, 1X PBS) overnight at 4°C. Following blocking, larvae were stained with 1:250 rabbit anti-human cleaved caspase 3 (BD Pharm, 559565) in SBS overnight at 4°C. Larvae were washed with PBST and incubated in 1:1000 anti-rabbit Alexa-488 (Invitrogen A27034) in SBS for 4 hours at room temperature. Imaging was performed using an Olympus DP73 camera on an Olympus IX73 microscope, followed by genotyping.

### **Assay for thrombin activity**

Thrombin activity was measured in plasma using a method adapted from Jagadeewaran and Liu<sup>15</sup>. Juvenile zebrafish were anesthetized at 1 month post fertilization and exsanguinated into 20 µl of solution consisting of 0.4% sodium citrate, 0.05% Tween-20, and 1X PBS. Following blood collection, this was mixed with 40 µl of buffer containing 10 mM cysteine, 10 mM Tris-HCl (pH 7.5), and 150 mM NaCl. Samples were centrifuged at 1000 RPM for 5 minutes to pellet cells and supernatants transferred to a polystyrene flat bottom 96 well plate, followed by addition of CaCl<sub>2</sub> and fibrinogen (Sigma F3879) to final concentrations of 4 mM and 10 mg/ml, respectively. The plate was immediately transferred to a spectrophotometer (Molecular Devices) for analysis. 10.2 units of bovine thrombin (Sigma T6200) was used as a positive control. Absorbance was measured every 2 minutes for a total of 90 minutes at room temperature and a wavelength of 405

nm. Two fish per genotype were pooled in each well. The average time to half maximal absorbance and maximum absorbance were calculated for each genotype.

## SUPPLEMENTAL REFERENCES

1. Mosimann C, Kaufman CK, Li P, Pugach EK, Tamplin OJ, Zon LI. Ubiquitous transgene expression and Cre-based recombination driven by the ubiquitin promoter in zebrafish. *Development*. 2011;138(1):169-177.
2. Zheng L, Baumann U, Reymond JL. An efficient one-step site-directed and site-saturation mutagenesis protocol. *Nucleic Acids Res*. 2004;32(14):e115.
3. van den Ent F, Lowe J. RF cloning: a restriction-free method for inserting target genes into plasmids. *J Biochem Biophys Methods*. 2006;67(1):67-74.
4. Livak KJ, Schmittgen TD. Analysis of relative gene expression data using real-time quantitative PCR and the 2(-Delta Delta C(T)) Method. *Methods*. 2001;25(4):402-408.
5. Huarng MC, Shavit JA. Simple and rapid quantification of thrombocytes in zebrafish larvae. *Zebrafish*. 2015;12(3):238-242.
6. Rost MS, Grzegorski SJ, Shavit JA. Quantitative methods for studying hemostasis in zebrafish larvae. *Methods Cell Biol*. 2016;134:377-389.
7. Hauptmann G, Gerster T. Two-color whole-mount in situ hybridization to vertebrate and *Drosophila* embryos. *Trends Genet*. 1994;10(8):266.
8. Hauptmann G, Gerster T. Multicolor whole-mount in situ hybridization. *Methods Mol Biol*. 2000;137:139-148.
9. Solnica-Krezel L, Driever W. Microtubule arrays of the zebrafish yolk cell: organization and function during epiboly. *Development*. 1994;120(9):2443-2455.
10. Thisse C, Thisse B. High-resolution in situ hybridization to whole-mount zebrafish embryos. *Nat Protoc*. 2008;3(1):59-69.
11. Liu Y, Kretz CA, Maeder ML, et al. Targeted mutagenesis of zebrafish antithrombin III triggers disseminated intravascular coagulation and thrombosis, revealing insight into function. *Blood*. 2014;124(1):142-150.
12. Hu Z, Holzschuh J, Driever W. Loss of DDB1 Leads to Transcriptional p53 Pathway Activation in Proliferating Cells, Cell Cycle Deregulation, and Apoptosis in Zebrafish Embryos. *PLoS One*. 2015;10(7):e0134299.
13. Tucker B, Lardelli M. A rapid apoptosis assay measuring relative acridine orange fluorescence in zebrafish embryos. *Zebrafish*. 2007;4(2):113-116.
14. Palencia-Desai S, Rost MS, Schumacher JA, et al. Myocardium and BMP signaling are required for endocardial differentiation. *Development*. 2015;142(13):2304-2315.
15. Jagadeeswaran P, Liu YC. Developmental expression of thrombin in zebrafish embryos: a novel model to study hemostasis. *Blood Cells Mol Dis*. 1997;23(2):147-156.

## SUPPLEMENTAL DATA

**Table S1. Comprehensive list of primers**

| Name                                               | Forward 5'→3'                                | Reverse 5'→3'                              |
|----------------------------------------------------|----------------------------------------------|--------------------------------------------|
| <b><i>f10</i> genotyping</b>                       |                                              |                                            |
| JS689, 729                                         | cccattcacagctttactcattt                      | gagactggcaggatttcccg                       |
| <b>qPCR</b>                                        |                                              |                                            |
| <i>18s</i>                                         | tcgctagttggcatcgtttatg                       | cggagggtcgaagacgatca                       |
| <i>f2</i>                                          | aggaagctcgagaagtgttg                         | ccctctgtagtcgacatatc                       |
| <i>f10</i>                                         | caagggttcaaggctacaa                          | cttccatcacctcacagaaa                       |
| <i>at3</i>                                         | actgtctatggaccaagttg                         | tggtgttggtgtctatggaac                      |
| <i>fga</i>                                         | gttactcaagaccacccctcac                       | ggatgtcgggcatacttcttc                      |
| <b>riboprobe generation</b>                        |                                              |                                            |
| <i>f10-s</i>                                       | taatacgaactactatagggatgtcttgggtttctggaact    | ccgccacagaagcccatgtt                       |
| <i>f10-as</i>                                      | aaaaaacatggatgtcttgggtttctggaact             | taatacgaactactataggccgccacagaagcccatgtt    |
| <i>efnb2a</i>                                      | cagacacgctctactcaactg                        | taatacgaactactatagggatagatgttggctggctctgt  |
| <i>cdh5</i>                                        | agacaccgctgacctgaaactg                       | taatacgaactactataggggcttgatttgaagaggtctg   |
| <i>ephB4</i>                                       | aggaggtcagtgctctggatga                       | taatacgaactactatagggggtaccagaacctcttgaac   |
| <i>flk1</i>                                        | cctcagtcaagccttcttcac                        | taatacgaactactatagggtcttggcttctgttctgat    |
| <i>flt4</i>                                        | acatgtctggttcagatcct                         | taatacgaactactatagggttagagagtgctgctggacctt |
| <b>Primers for zebrafish <i>f10</i> constructs</b> |                                              |                                            |
| pubi: <i>zf10-egfp</i>                             | tcatgaatgtcttgggttttc                        | tcatgacgactcttctattg                       |
| pubi: <i>zf10-p2A-egfp</i>                         | caagacaccaataagaagagtggaaagcggagctactaactcag | gctcctcgcccttgctcaccat                     |
| <b>Site-directed mutagenesis</b>                   |                                              |                                            |
| hR68C                                              | gaggaggctgctgcgaaatcttcaagatgttaaaaagacgg    | ataattgcagcgtctctcaatgcactcgcgctccatgttc   |
| hG173W                                             | caaatgttgggtcatttatccaaagaagaccagaagcatc     | aatggtacctgagactggcaggatttcccgttggggcca    |
| hT176_Q186                                         | cacacgcgaacatcaccgaaagcagagaacgaagaagagac    | gacgccacattgaaatggatcctgagactggcaggatttc   |
| G262D                                              | ttctgtgatggaaccttctgagcaggttctacatcctaac     | ggttccatcacagaaacctcgttttctcattgatgagc     |
| C390F                                              | acagctcaagctgtccagcagcttcatcaccagaa          | acagcttgaagctgttgcggtccacgtaggcaccctccag   |
| I323M                                              | cctaccacaacgacatggccctcatcaagctctcgaac       | tgtaggctggtatgttctgtggtatcagaatctcatctac   |
| Q416L                                              | agaaagatgcatgtctgggggacagcggcggcggcga        | cctcctggtcgtatccagcgcagaacatgcggccggagat   |
| <b>Sequencing</b>                                  |                                              |                                            |
| JS952                                              | agttcttgacagaggtgtaa                         |                                            |
| JS942                                              | tatttctgaaaaaattct                           |                                            |
| JS943                                              | tctcaaagcagtccatctg                          |                                            |
| JS944                                              | aacgcaaatattaacggtaa                         |                                            |
| JS945                                              | tgctatgtatgctctgtaa                          |                                            |
| JS946                                              | agaccttataaataaaaaa                          |                                            |
| JS825                                              | aaaaaacatggatgtcttgggtttctggaact             |                                            |
| JS832                                              | agaccgacagcatgttcggg                         |                                            |
| JS847                                              | ttacgtcggctccagctcg                          |                                            |
| JS387                                              | cgaccactaccagcagaaca                         |                                            |
| JS1014                                             | gatacgaaccaggaggagaaaga                      |                                            |
| JS1025                                             | gctcctcgcccttgctcaccat                       |                                            |

**Table S2. Expression vectors**

| No. | Backbone | Promoter   | p2A | Note                   |
|-----|----------|------------|-----|------------------------|
| 191 | Tol2     | <i>ubi</i> | -   | <i>zf10_hG262D</i>     |
| 196 | Tol2     | <i>ubi</i> | -   | <i>zf10</i>            |
| 203 | Tol2     | <i>ubi</i> | -   | <i>zf10_hC390F</i>     |
| 213 | Tol2     | <i>ubi</i> | +   | <i>zf10_hR68C</i>      |
| 214 | Tol2     | <i>ubi</i> | +   | <i>zf10_hG173W</i>     |
| 215 | Tol2     | <i>ubi</i> | +   | <i>zf10_hT176_Q186</i> |
| 216 | Tol2     | <i>ubi</i> | +   | <i>zf10_I323M</i>      |
| 217 | Tol2     | <i>ubi</i> | +   | <i>zf10_Q416L</i>      |
| 219 | Tol2     | <i>ubi</i> | +   | <i>zf10</i>            |

**Table S3. Hemorrhagic phenotypes identified by histologic analysis**

| Age     | Total | <i>f10</i> <sup>+/+</sup> | <i>f10</i> <sup>+/-</sup> | <i>f10</i> <sup>-/-</sup> | sites of hemorrhage in <i>f10</i> <sup>-/-</sup> |
|---------|-------|---------------------------|---------------------------|---------------------------|--------------------------------------------------|
| 27 dpf  | 6     | 3                         | 0                         | 3                         | brain, muscle, abdomen, fin                      |
| 33 dpf  | 7     | 3                         | 0                         | 4                         | brain, abdomen                                   |
| 39 dpf  | 3     | 1                         | 0                         | 2                         | brain, abdomen, muscle                           |
| 48 dpf  | 15    | 5                         | 5                         | 5                         | brain, muscle, abdomen, fin                      |
| 268 dpf | 3     | 1                         | 1                         | 1                         | fin                                              |

**Table S4. Relative expression of vascular markers in wild type versus *f10*<sup>-/-</sup> mutants**

| Gene_ID            | Gene          | Locus                    | FPKM<br>+/+ | FPKM<br>-/- | log2<br>(fold change) | p-value |
|--------------------|---------------|--------------------------|-------------|-------------|-----------------------|---------|
| ENSDARG00000037373 | <i>ephb2a</i> | 23:22097551-<br>22240745 | 1.46867     | 1.34685     | -0.124917             | 0.497   |
| ENSDARG00000075549 | <i>cdh5</i>   | 7:45433469-<br>45568430  | 7.66435     | 7.68367     | 0.00363315            | 0.979   |
| ENSDARG00000015815 | <i>kdrl</i>   | 14:33838842-<br>33899405 | 3.17005     | 3.30249     | 0.0590478             | 0.682   |
| ENSDARG00000015717 | <i>flt4</i>   | 14:19717037-<br>19856641 | 1.95701     | 2.2628      | 0.209455              | 0.222   |
| ENSDARG00000040346 | <i>ephB4a</i> | 5:70801142-<br>70856493  | 0.824275    | 0.984351    | 0.256046              | 0.762   |
| ENSDARG00000040346 | <i>ephB4a</i> | 5:70801142-<br>70856493  | 7.72658     | 8.85288     | 0.196316              | 0.191   |
| ENSDARG00000040346 | <i>ephB4a</i> | 5:70801142-<br>70856493  | 1.65191     | 1.26684     | -0.382896             | 0.550   |
| ENSDARG00000027112 | <i>ephB4b</i> | 23:44476383-<br>44528029 | 3.30656     | 3.62652     | 0.133255              | 0.574   |
| ENSDARG00000027112 | <i>ephB4b</i> | 23:44476383-<br>44528029 | 2.87297     | 2.71808     | -0.0799556            | 0.756   |

FPKM, fragments per kilobase of exon per million aligned fragments.

**Table S5. Clinical data of patients with previously unknown variants**

| <b>Mutation</b>    | <b>F10 antigen</b> | <b>F10 activity</b> | <b>Allelic status</b>                          | <b>Symptoms</b>                                                             | <b>Treatment</b> |
|--------------------|--------------------|---------------------|------------------------------------------------|-----------------------------------------------------------------------------|------------------|
| R68C               | 77                 | 5                   | Compound heterozygous with FX Friuli (P383S)   | Spontaneous ecchymosis and hematomas                                        | ND               |
| G173W              | ND                 | <1                  | Compound heterozygous with frameshift mutation | Spontaneous petechiae, ecchymosis, hematoma                                 | RBCs, FFP, PCCs  |
| $\Delta$ T176_Q186 | 35                 | 4                   | Homozygous                                     | Spontaneous gingival bleeding, epistaxis, hemarthrosis, hematoma, hematuria | ND               |
| I323M              | <1                 | <1                  | Compound heterozygous with frameshift mutation | Bleeding 10 days after tongue bite                                          | ND               |
| Q416L              | 36                 | 2                   | Compound heterozygous with frameshift mutation | Spontaneous epistaxis                                                       | Cauterization    |

ND, no data; RBCs, red blood cell transfusions; FFP, fresh frozen plasma transfusion; PCCs, prothrombin complex concentrates.

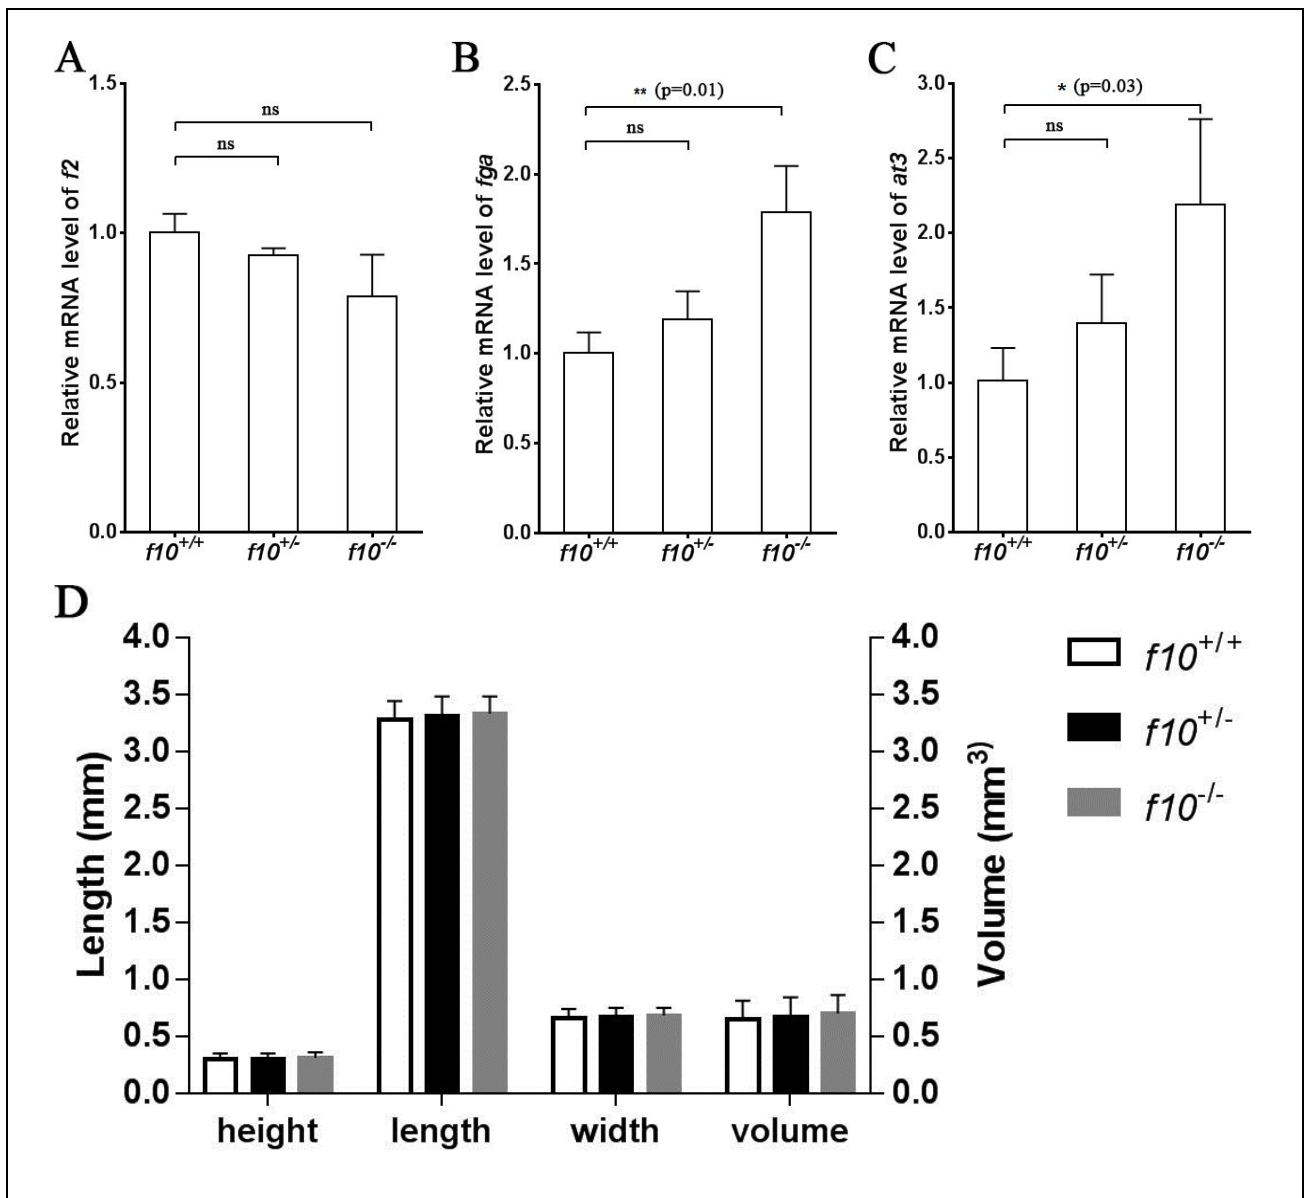

**Figure S1. Expression of coagulation factors in *f10* mutants are altered in a dose dependent fashion.** (A) *f2* mRNA was progressively downregulated in *f10*<sup>+/-</sup> and *f10*<sup>-/-</sup> mutants, although the results were not statistically significant (Student's *t*-test). (B) The expression level of coagulation factor *fga* was upregulated in both *f10*<sup>+/-</sup> and *f10*<sup>-/-</sup> mutants, although this effect was only significant for the homozygous mutants ( $p < 0.01$ ). (C) Expression of *at3* demonstrated nearly 1.5- and over 2-fold increases in *f10*<sup>+/-</sup> and *f10*<sup>-/-</sup> mutants, respectively, although the effect was only significant for the latter ( $p < 0.05$ ). mRNAs were normalized to *18s* rRNA. (D) Anesthetized 3 dpf zebrafish larvae were measured in mm at the yolk sac (height), rostrum to tail tip (length), eye-to-eye (width), and all 3 linear measurements multiplied to calculate volume (mm<sup>3</sup>). Data were collected prior to genotyping. The numbers of embryos analyzed per genotype were as follows; *f10*<sup>+/+</sup>  $n=29$ , *f10*<sup>+/-</sup>  $n=57$ , *f10*<sup>-/-</sup>  $n=26$ . There were no statistically significant differences between mutant and wild type larvae (Student *t* test).



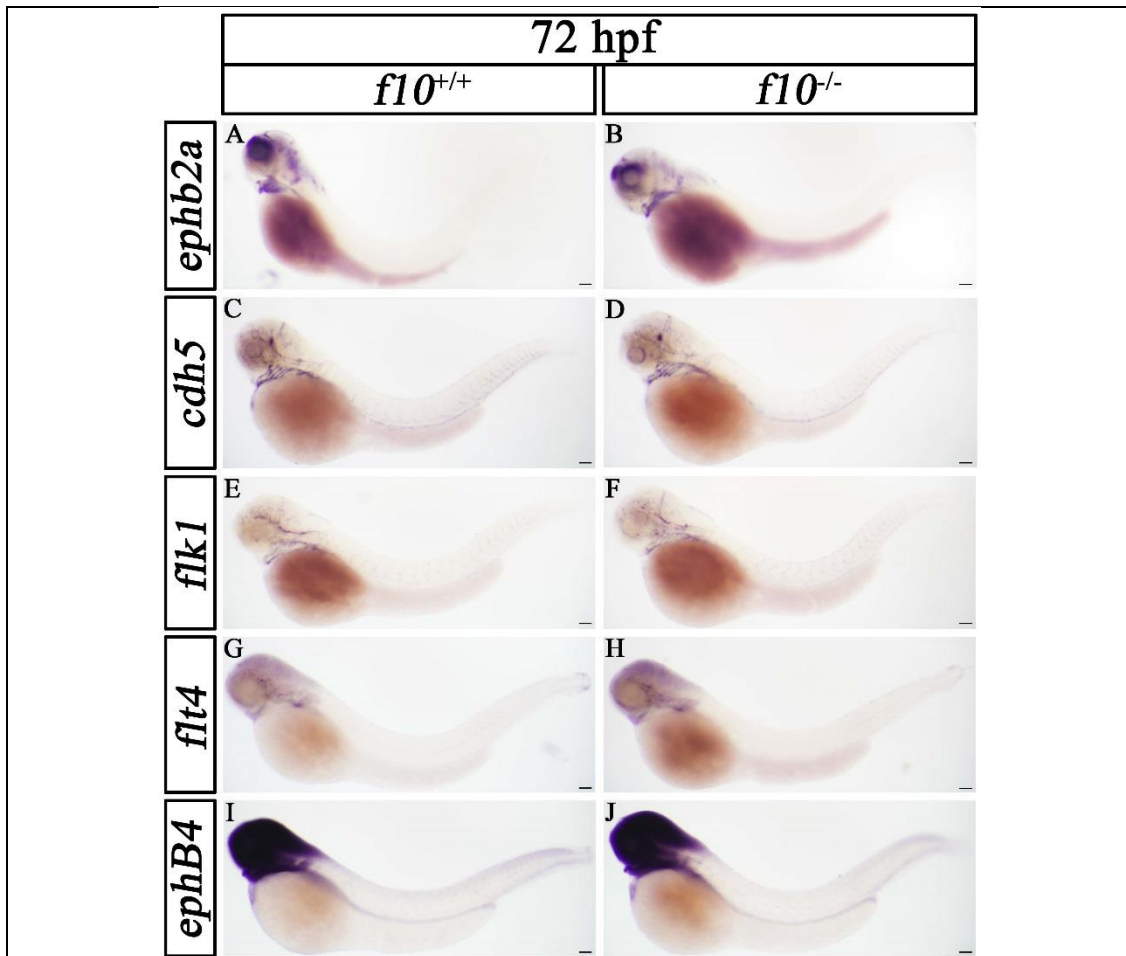

**Figure S2. WISH reveals normal expression of arterial and venous markers in *f10* mutants.** Offspring from *f10*<sup>+/-</sup> incrosses were subjected to WISH, phenotypically examined and categorized, and subsequently genotyped. The spatiotemporal expression patterns of *ephb2a* (A-B), *cdh5* (C-D), *flk1* (E-F), *flt4* (G-H), and *ephB4* (I-J) were indistinguishable between *f10*<sup>-/-</sup> mutants and *f10*<sup>+/+</sup> and *f10*<sup>+/-</sup> siblings. Anterior is to the left. Scale bar: 100  $\mu$ m.

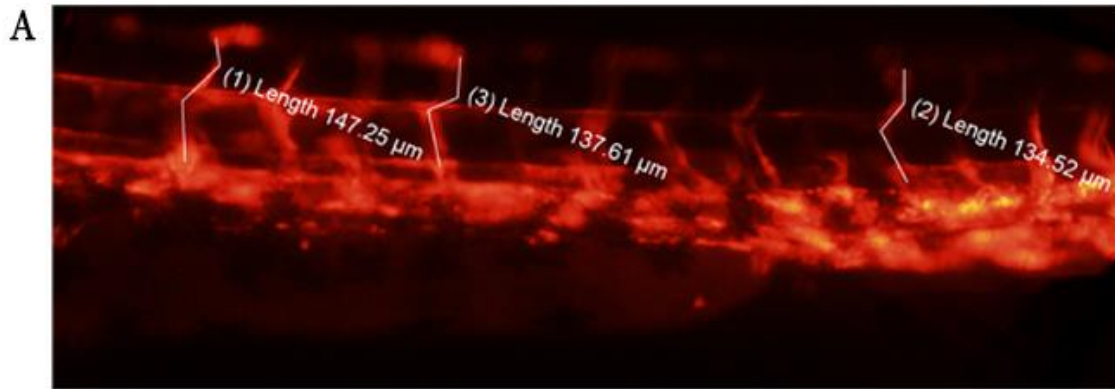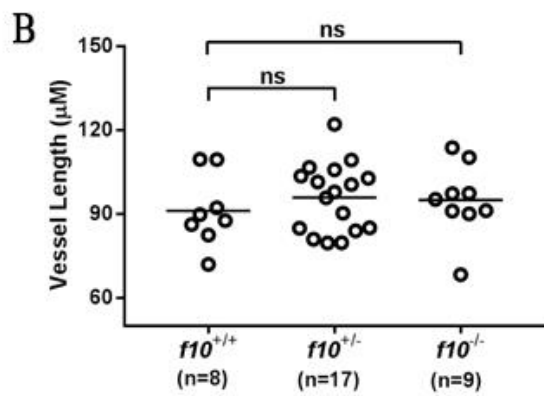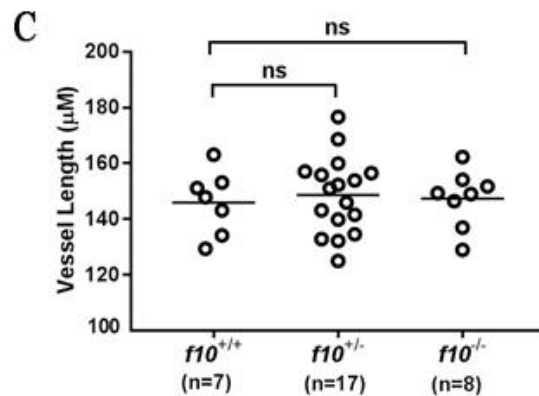

**Figure S3. Intersegmental vessel (ISV) measurement does not reveal any significant abnormality in the vascular development of *f10* mutants.** (A) ISVs were traced and measured in *f10* mutant and *Tg(flk1:mCherry/NTR)* embryos using cellSense Software (Olympus), followed by genotyping. (B-C) Averaged results are shown for 24 and 48 hpf embryos, respectively. ns, not significant.

A

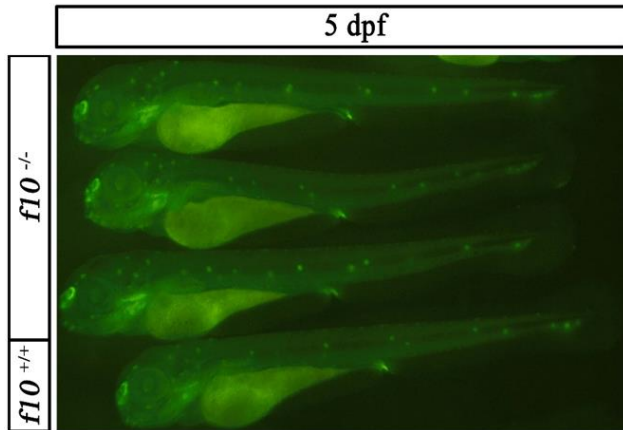

C

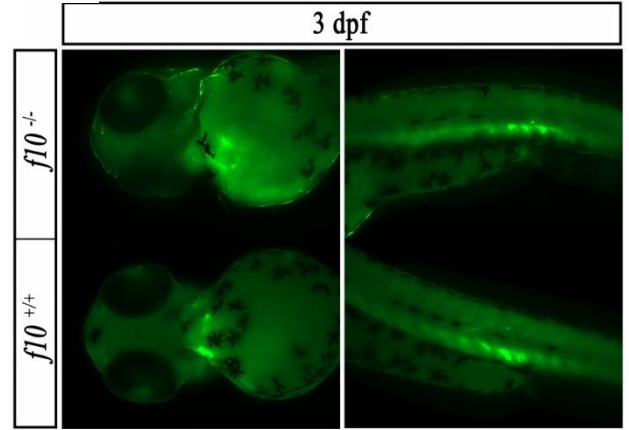

B

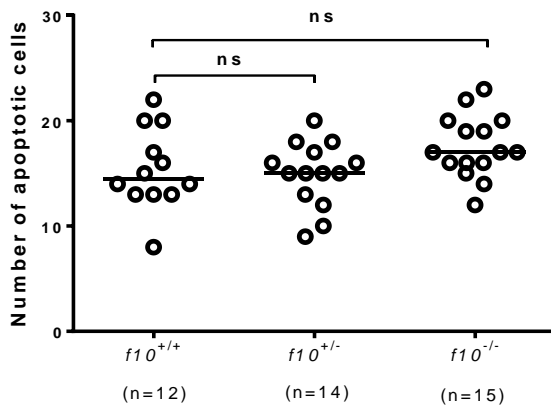

D

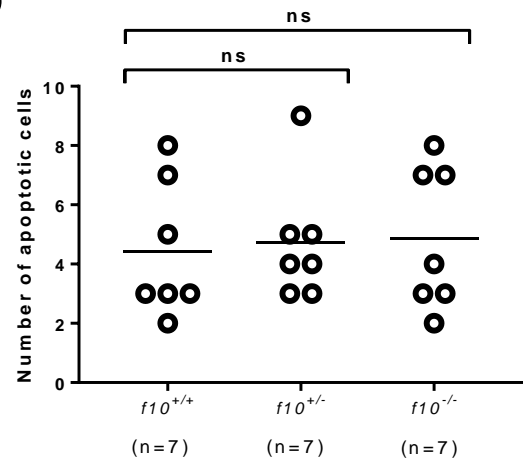

**Figure S4. No increased apoptosis is detected in  $f10$  mutants.** Larvae were stained with acridine orange (A-B) or probed with an antibody to caspase 3 (C-D) to detect apoptic cells, followed by blinded phenotypic evaluation and subsequent genotyping. Anterior is to the left. (B, D) The number of apoptotic cells were counted and no significant differences in fluorescent cells were observed between  $f10^{+/+}$  and  $f10^{-/-}$  mutant larvae. ns, not significant by Student  $t$  test.

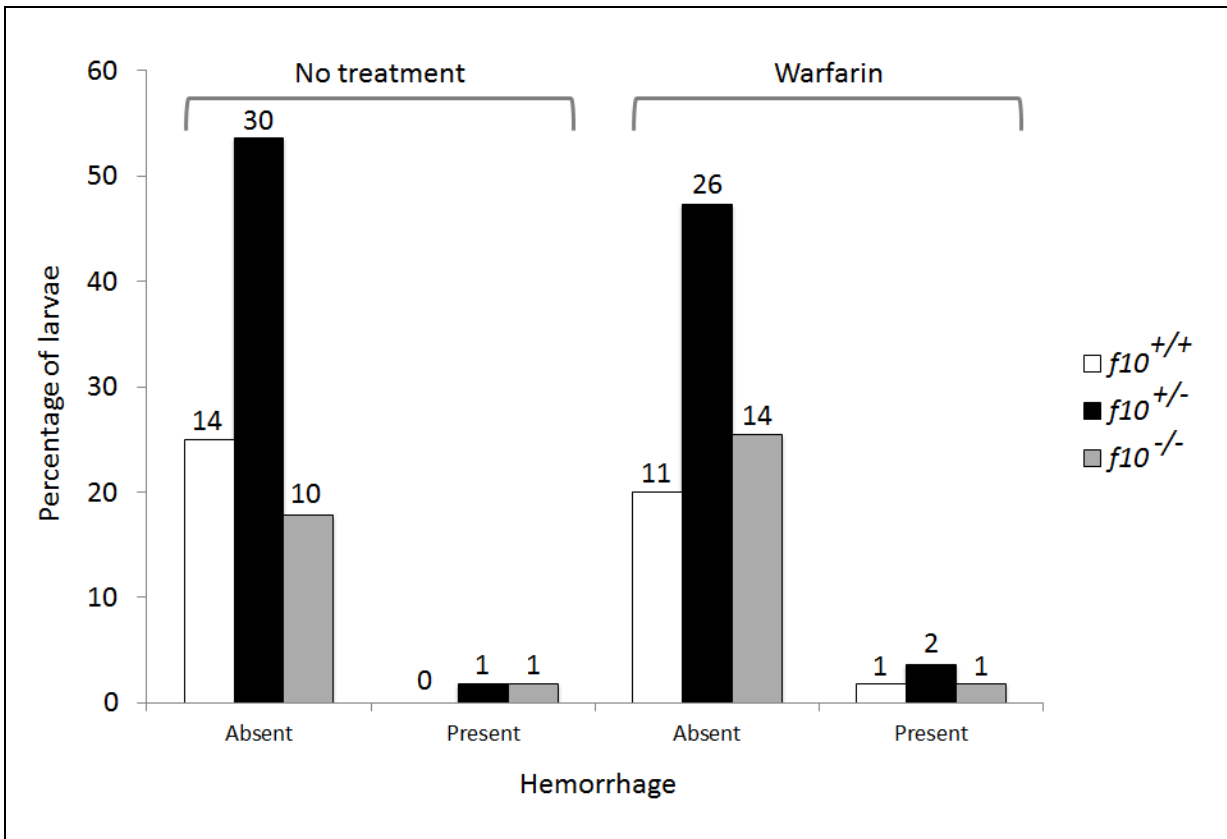

**Figure S5. Treatment of  $f10$  mutant embryos with warfarin does not increase the incidence of grossly visible hemorrhage.** Embryos from  $f10^{+/-}$  incrosses were treated with either warfarin (10  $\mu\text{g}/\text{mL}$ ) or E3 medium as a control at 1 dpf and stained with o-dianisidine at 7 dpf. The presence of hemorrhage was evaluated by a blinded observer, followed by genotyping. There was no significant difference in hemorrhage between the treated and untreated groups across all 3 genotypes. The y-axis indicates percentage amongst each category (no treatment vs. warfarin) and the numbers above the bars indicate the quantity of larvae in that group.
